# Supplementary material for: Bismuth oxybromide nanosheets as an efficient photocatalyst for dye degradation
Source: Royal Society of Chemistry journal article supplement (doi:10.1039/d4dt02180k), 2024-01-01
Supplement: d4dt02180k1.pdf [file d4dt02180k1.pdf]

Supporting Information for

## Bismuth Oxybromide Nanosheet as an Efficient Photocatalyst for Dye Degradation

Joy N. Onwumere<sup>1,#</sup>, Rong Hua<sup>2,#</sup>, Guojun Zhou<sup>1</sup>, Haoquan Zheng<sup>2</sup>, and Zhehao Huang<sup>1,\*</sup>

<sup>1</sup>Department of Materials and Environmental Chemistry, Stockholm University, Stockholm SE-106 91, Sweden

<sup>2</sup>School of Chemistry and Chemical Engineering, Shaanxi Normal University, Xi'an 710119, China

Email: zhehao.huang@mmk.su.se

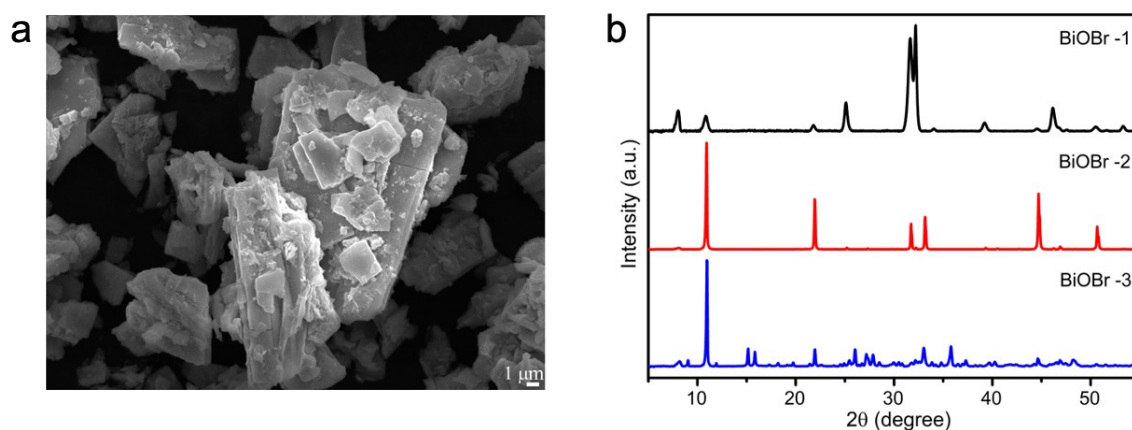

**Figure S1.** (a) SEM image of BiOBr-3. (b) Comparison of PXRD patterns of BiOBr.

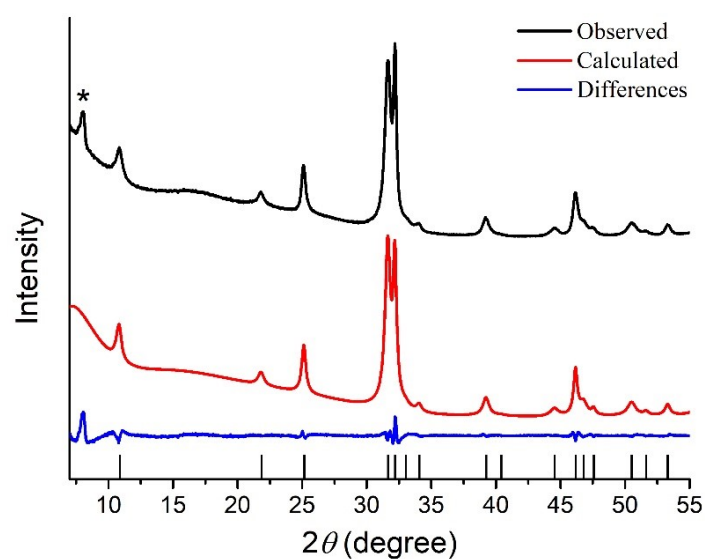

**Figure S2.** Pawley fitting against powder X-ray diffraction ( $\lambda = 1.5418\text{\AA}$ ) for BiOBr. Red line: calculated; black line: observed; blue line: difference; black bars: Bragg conditions. Peaks marked with black stars in the observed pattern cannot be found in the simulated one. This peak should come from impurities during the synthesis.

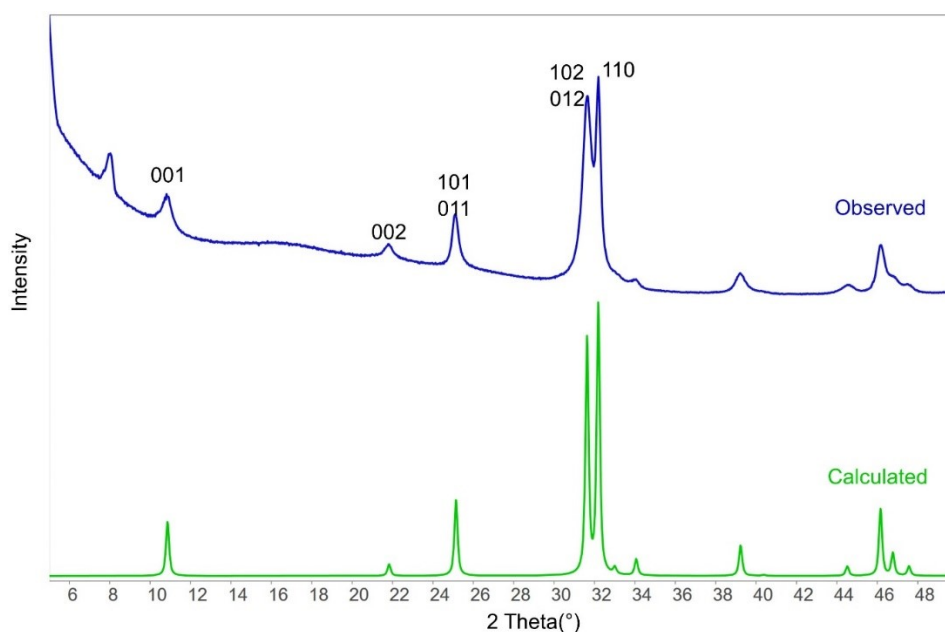

**Figure S3.** Simulated PXRD pattern ( $\lambda = 1.5418\text{\AA}$ ) of BiOBr by using the structural model obtained from crystal structure solved by 3DED. It agrees well with the observed PXRD pattern.

**Table S1.** Single crystal data collection and crystallographic data for BiOBr ( $\lambda = 0.0251\text{\AA}$ ).

|                                        |               |
|----------------------------------------|---------------|
| Tilt range ( $^{\circ}$ )              | -53.0 to 61.3 |
| Rotation angle ( $^{\circ}$ )          | 114.3         |
| Tilt rate ( $^{\circ}\text{ s}^{-1}$ ) | 1.2           |
| Exposure time per frame (s)            | 0.3           |
| Total number of images                 | 324           |
| Data collection time (min)             | 1.6           |
| Beam current (pA)                      | < 0.01        |

**Table S2.** Single crystal data collection and crystallographic data for BiOBr ( $\lambda = 0.0251\text{\AA}$ ).

|                         |            |
|-------------------------|------------|
| Chemical Formula        | BiBrO      |
| Formula weight          | 304.88     |
| Crystal system          | Tetragonal |
| Space Group             | $P4/nmm$   |
| $a$ ( $\text{\AA}$ )    | 4.1750(8)  |
| $b$ ( $\text{\AA}$ )    | 4.1750(8)  |
| $c$ ( $\text{\AA}$ )    | 8.5700(17) |
| $\alpha$ ( $^{\circ}$ ) | 90         |

|                                             |           |
|---------------------------------------------|-----------|
| $\beta$ (°)                                 | 90        |
| $\gamma$ (°)                                | 90        |
| Volume                                      | 149.38(6) |
| <i>Z</i>                                    | 2         |
| Wavelength (Å)                              | 0.0251    |
| Temperature (K)                             | 293(2)    |
| Completeness (%)                            | 74.0      |
| No. of reflections (all unique)             | 88        |
| No. of reflections ( $F_o > 4\sigma(F_o)$ ) | 530       |
| Refined parameters                          | 6         |
| $R_{int}$                                   | 0.2836    |
| $R_1$ ( $F_o > 2\sigma(F_o)$ )              | 0.2571    |
| $R_1$ (all reflections)                     | 0.2635    |
| GOF                                         | 3.458     |

**Table S3.** Crystallographic details of Pawley fitting of BiOBr.

|                          |               |
|--------------------------|---------------|
| Crystal system           | Tetragonal    |
| Space group              | <i>P4/nmm</i> |
| <i>a</i> (Å)             | 3.9280(3)     |
| <i>b</i> (Å)             | 3.9280(3)     |
| <i>c</i> (Å)             | 8.128(1)      |
| $\alpha$ (°)             | 90.0          |
| $\beta$ (°)              | 90.0          |
| $\gamma$ (°)             | 90.0          |
| Volume (Å <sup>3</sup> ) | 125.4(0)      |
| wavelength (Å)           | 1.5406        |
| $R_p$ (%)                | 3.1           |
| $R_{w_p}$ (%)            | 4.4           |
| $R_{exp}$ (%)            | 1.2           |
| GOF                      | 3.6           |

## References

- (1) Cichocka, M. O.; Ångström, J.; Wang, B.; Zou, X.; Smeets, S. High-Throughput Continuous Rotation Electron Diffraction Data Acquisition via Software Automation. *J Appl Cryst* **2018**, *51* (6), 1652–1661. <https://doi.org/10.1107/S1600576718015145>.
- (2) Kabsch, W. XDS. *Acta Cryst D* **2010**, *66* (2), 125–132. <https://doi.org/10.1107/S0907444909047337>.
